# Supplementary material for: A High-Fat Diet Enriched with Fish Oil Affects Metabolic Pathways in The Hypothalamus of Rats: A Proteomic Approach
Source: Research Square preprint supplement (doi:10.21203/rs.3.rs-1348063/v1), 2022-02-16
Supplement: Supplementary file 1 [file 0408bfea0d06ac93b08e2335.xlsx]

## Sheet: Sheet1
Additional file 1: Mass spectrometry parameters and null hypothesis test results between Control and Fish-oil groups of the hypothalamic proteome dataset
UniProt ID	Protein	Protein score (mean)	False positive rate	Matched peptides	Sequence coverage (%)	Fold change Fish/Control	p-valor (teste t)	fdr (teste t)
A9UMV8	Histone H2A.J	14869.7	0	3.75	30.3617	1.0161	0.901436	0.9701
B0BNN3	Carbonic anhydrase 1	626.264	0.29	6.58333	43.4233	0.674608	0.0223461	0.165777
B2GUZ5	F-actin-capping protein subunit alpha-1	471.286	0.336667	7.41667	33.3625	0.757097	0.00639632	0.0911184
B2RYG6	Ubiquitin thioesterase OTUB1	1478.93	0	9.41667	42.9275	0.999649	0.994985	0.999717
B3GNI6-3	Isoform 3 of Septin-11	297.612	1.38444	13.9167	25.5867	1.49754	0.155458	0.464494
D3ZAF6	ATP synthase subunit f, mitochondrial	2212.93	0	2.66667	32.5733	0.690945	0.191872	0.504742
O08651	D-3-phosphoglycerate dehydrogenase	330.667	0.731667	10.75	22.7025	0.845976	0.276018	0.557276
O08838	Amphiphysin	648.803	0.19	15	26.6825	0.934266	0.456746	0.676508
O35095	Neurochondrin	939.299	0	15.25	29.0458	1.16397	0.0650253	0.284152
O35179	Endophilin-A1	650.553	0.19	8.91667	28.575	0.880413	0.51754	0.725865
O35244	Peroxiredoxin-6	14302.2	0	15.9167	77.495	0.824421	0.00303825	0.0560059
O35264	Platelet-activating factor acetylhydrolase IB subunit beta	4979.53	0	4.5	27.8375	0.795232	0.0078188	0.0928532
O35331	Pyridoxal kinase	1961.17	0	9.91667	42.735	1.6197	3.91249e-05	0.00620348
O35567	Bifunctional purine biosynthesis protein PURH	226.669	1.02	13.2727	22.3591	1.02465	0.91232	0.9701
O35796	Complement component 1 Q subcomponent-binding protein, mitochondrial	1187.79	0	4.75	29.9867	0.879367	0.257725	0.54523
O35814	Stress-induced-phosphoprotein 1	321.602	0.362	18.1667	33.685	0.795171	0.536003	0.743413
O35987	NSFL1 cofactor p47	840.423	0	11.5833	37.3425	0.888579	0.274995	0.557276
O88600	Heat shock 70 kDa protein 4	762.068	0	26.25	39.7217	1.00021	0.999263	0.999717
O88767	Protein DJ-1	3685.96	0	6.66667	51.7633	1.04287	0.541445	0.744487
O88989	Malate dehydrogenase, cytoplasmic	12951.5	0	14.25	43.6867	1.0334	0.327136	0.603216
P00507	Aspartate aminotransferase, mitochondrial	8558.44	0	24.1667	63.4883	1.26105	0.000517257	0.0195174
P00564	Creatine kinase M-type	473.865	0.32	9.25	28.04	1.05799	0.697708	0.843064
P01830	Thy-1 membrane glycoprotein	3599.84	0	6.16667	39.5442	1.3278	0.116908	0.40739
P01946	Hemoglobin subunit alpha-1/2	73040.5	0	13	84.1567	1.01504	0.75956	0.890807
P02091	Hemoglobin subunit beta-1	60486.7	0	18.5833	88.0392	0.981077	0.655375	0.828473
P02625	Parvalbumin alpha	1120.72	1.62	4.11111	38.89	0.684719	0.156559	0.464494
P02650	Apolipoprotein E	599.831	0.19	10.6364	33.9164	0.861573	0.258087	0.54523
P02688-2	Isoform 2 of Myelin basic protein	28314.6	0	8.83333	48.7167	0.823175	0.188397	0.504742
P02770	Serum albumin	5920.17	0	26.25	51.7	0.86849	0.0410063	0.225534
P04631	Protein S100-B	27930.7	0	6.16667	41.8508	0.91191	0.0393923	0.220459
P04636	Malate dehydrogenase, mitochondrial	25868.8	0	17.75	61.76	1.10147	9.72332e-05	0.00620348
P04642	L-lactate dehydrogenase A chain	9156.53	0	18.9167	62.9517	1.22114	0.00436739	0.0733262
P04692-5	Isoform 5 of Tropomyosin alpha-1 chain	3065.09	0	13.25	45.2375	0.965221	0.887483	0.9701
P04764	Alpha-enolase	3418.83	0	20.75	54.5508	1.13374	0.0125357	0.11108
P04797	Glyceraldehyde-3-phosphate dehydrogenase	25400.2	0	26.0833	62.1117	1.04785	0.226879	0.527264
P04897	Guanine nucleotide-binding protein G(i) subunit alpha-2	1277.43	0.435	10	30.4933	1.28711	0.202822	0.52202
P04905	Glutathione S-transferase Mu 1	3643.02	0	13.75	54.7775	1.14445	0.218622	0.527264
P04906	Glutathione S-transferase P	5159.96	0	8.58333	49.88	1.13365	0.265521	0.550009
P05065	Fructose-bisphosphate aldolase A	7920.26	0	20.75	67.0108	1.04867	0.618245	0.811606
P05708	Hexokinase-1	1561.94	0	28.9167	34.2608	1.05051	0.428577	0.676508
P05712	Ras-related protein Rab-2A	1858.23	0	8.36364	45.3255	0.837813	0.0774717	0.325177
P06685	Sodium/potassium-transporting ATPase subunit alpha-1	1697.04	0.19	21.5833	24.855	0.657293	0.192159	0.504742
P06686	Sodium/potassium-transporting ATPase subunit alpha-2	2883.18	0	29.3333	32.5817	0.681554	0.400485	0.658529
P06687	Sodium/potassium-transporting ATPase subunit alpha-3	3966.83	0	33.8333	40.9675	0.818697	0.541298	0.744487
P06761	78 kDa glucose-regulated protein	4977.52	0	21.8333	38.4542	0.996933	0.947187	0.986766
P07171	Calbindin	3269.05	0	15	55.1733	0.960935	0.804373	0.916649
P07323	Gamma-enolase	12192.4	0	26.25	71.1592	1.02191	0.743055	0.884457
P07335	Creatine kinase B-type	27335.2	0	26.3333	70.255	0.876736	0.0420556	0.227385
P07340	Sodium/potassium-transporting ATPase subunit beta-1	3315.35	0	9.25	31.4975	0.826454	0.394698	0.655775
P07632	Superoxide dismutase [Cu-Zn]	35437.2	0	8.66667	75.865	0.852873	0.0297347	0.197612
P07722-2	Isoform S-MAG of Myelin-associated glycoprotein	568.013	0.86	7.41667	17.6558	0.715059	0.177238	0.49418
P07825	Synaptophysin	2529.67	0	5	17.3183	0.980086	0.910117	0.9701
P07895	Superoxide dismutase [Mn], mitochondrial	4716.4	0	9.16667	53.0767	0.94002	0.0804562	0.328399
P07936	Neuromodulin	14493.8	0	5	33.8867	0.916363	0.452184	0.676508
P07943	Aldose reductase	744.367	3.97	8.91667	34.915	1.39922	0.0105958	0.101543
P08009	Glutathione S-transferase Yb-3	10713.5	0	16.25	65.8258	1.01119	0.850312	0.951753
P08081	Clathrin light chain A	1566.72	0	6.36364	21.5164	0.907496	0.577796	0.774441
P08413	Calcium/calmodulin-dependent protein kinase type II subunit beta	1498.42	0	12.0833	32.3033	1.15131	0.164564	0.468715
P08461	Dihydrolipoyllysine-residue acetyltransferase component of pyruvate dehydrogenase complex, mitochondrial	729.232	0	15.4167	32.1858	1.19957	0.00223239	0.0513554
P09117	Fructose-bisphosphate aldolase C	7419.69	0	23.0833	58.31	0.944572	0.45769	0.676508
P09606	Glutamine synthetase	2284.81	0	11.5	39.075	1.01361	0.877402	0.969543
P09626	Potassium-transporting ATPase alpha chain 1	563.692	1.17667	15.75	16.16	0.453722	0.154051	0.464494
P10111	Peptidyl-prolyl cis-trans isomerase A	7511.2	0	14.3333	75.8125	0.877294	0.0346517	0.212575
P10362	Secretogranin-2	1752.31	0	19.5	42.6492	0.853157	0.0340443	0.212575
P10719	ATP synthase subunit beta, mitochondrial	35466.9	0	28	65.3742	0.996968	0.931066	0.984149
P10818	Cytochrome c oxidase subunit 6A1, mitochondrial	2362.77	0	2.7	43.602	1.00826	0.931702	0.984149
P10860	Glutamate dehydrogenase 1, mitochondrial	5638.99	0	30.5833	55.5858	1.05201	0.791712	0.911148
P10888	Cytochrome c oxidase subunit 4 isoform 1, mitochondrial	4425.85	0	7.66667	41.2233	0.863419	0.2606	0.546917
P10960	Sulfated glycoprotein 1	483.768	0.564	7.4	13.99	1.06508	0.818243	0.925601
P11030	Acyl-CoA-binding protein	12496.8	0	5.91667	60.1525	0.778906	0.137441	0.42984
P11232	Thioredoxin	7224.13	0	3.81818	41.2991	0.74917	0.000550647	0.0195174
P11240	Cytochrome c oxidase subunit 5A, mitochondrial	2931.48	0	6.41667	49.3158	0.916762	0.473075	0.689091
P11275	Calcium/calmodulin-dependent protein kinase type II subunit alpha	2381.32	0	13	38.355	1.14729	0.13501	0.42984
P11348	Dihydropteridine reductase	770.929	0	7.63636	43.3809	0.984762	0.895327	0.9701
P11442	Clathrin heavy chain 1	3563.51	0	71.6667	47.1292	0.999967	0.99894	0.999717
P11517	Hemoglobin subunit beta-2	54534.5	0	19.25	88.945	0.916687	0.325608	0.603216
P11598	Protein disulfide-isomerase A3	2803.57	0	23.75	51.9975	0.964666	0.437771	0.676508
P11884	Aldehyde dehydrogenase, mitochondrial	431	0.266667	12.8333	31.6633	1.16525	0.316508	0.601426
P11980	Pyruvate kinase PKM	14978.7	0	31.1667	63.7933	1.07318	0.110801	0.392726
P11980-2	Isoform M2 of Pyruvate kinase PKM	14013.3	0	29.3333	59.7775	1.08601	0.877515	0.969543
P12075	Cytochrome c oxidase subunit 5B, mitochondrial	3490.96	0	7	46.835	1.03033	0.648539	0.828473
P12346	Serotransferrin	518.43	0.38	18.75	28.5683	0.880538	0.64324	0.828473
P12368	cAMP-dependent protein kinase type II-alpha regulatory subunit	376.523	0.44	9	21.0609	1.15427	0.49216	0.700888
P12711	Alcohol dehydrogenase class-3	277.608	0.524	5.88889	18.8656	1.11477	0.714564	0.860173
P12785	Fatty acid synthase	154.29	1.63	34.25	12.7867	1.0973	0.435022	0.676508
P12839	Neurofilament medium polypeptide	2990.64	0	24.75	37.2933	0.851995	0.0161037	0.13884
P13221	Aspartate aminotransferase, cytoplasmic	5920.55	0	23.8333	64.79	0.900338	0.00571533	0.0911184
P13233	2'_3'-cyclic-nucleotide 3'-phosphodiesterase	20788	0	24.1667	52.7367	1.06772	0.223574	0.527264
P13596	Neural cell adhesion molecule 1	525.729	0.38	18.75	27.3108	0.958929	0.815334	0.925593
P13668	Stathmin	5348.01	0	6.27273	38.4391	0.894422	0.50891	0.718329
P14046	Alpha-1-inhibitor 3	354.87	0.54	25.0909	17.1118	0.811761	0.0632016	0.284152
P14659	Heat shock-related 70 kDa protein 2	7970.5	0	18.6667	29.0942	0.663988	0.443963	0.676508
P14668	Annexin A5	1102.14	0	10	35.3655	0.64119	0.00866977	0.0928532
P14942	Glutathione S-transferase alpha-4	285.2	0.754286	5.55556	21.8711	0.814077	0.483729	0.69197
P15205	Microtubule-associated protein 1B	330.305	0.272	37.1667	16.5408	0.881318	0.0208966	0.158715
P15429	Beta-enolase	2976.59	0	13.5833	40.5533	0.8229	0.763752	0.892443
P15865	Histone H1.4	1537.56	0	5.33333	23.6667	1.11184	0.185477	0.504742
P15999	ATP synthase subunit alpha, mitochondrial	16917.9	0	26.8333	50.9483	1.05381	0.00201733	0.0513554
P16036	Phosphate carrier protein, mitochondrial	876.183	0	7.1	20.813	0.822167	0.451037	0.676508
P16086	Spectrin alpha chain, non-erythrocytic 1	1816.57	0	105.75	50.9642	0.864835	0.0392304	0.220459
P16617	Phosphoglycerate kinase 1	6147.79	0	19.25	47.9025	0.980753	0.306324	0.595443
P16884	Neurofilament heavy polypeptide	1652.47	0	19.1667	20.655	1.08776	0.344969	0.615072
P18418	Calreticulin	2253.53	0	13.75	47.8558	0.981925	0.791015	0.911148
P18484	AP-2 complex subunit alpha-2	688.194	0	25.3333	33.6192	1.81449	0.183193	0.50378
P19234	NADH dehydrogenase [ubiquinone] flavoprotein 2, mitochondrial	8381.91	0	7.33333	34.1733	0.838069	0.00127428	0.0406495
P19511	ATP synthase F(0) complex subunit B1, mitochondrial	722.397	0.36	8.9	28.945	0.836075	0.243518	0.53207
P19527	Neurofilament light polypeptide	4381.09	0	24.8333	49.4458	0.942509	0.364336	0.631647
P19804	Nucleoside diphosphate kinase B	8617.19	0	9.25	61.02	0.759538	0.00816094	0.0928532
P20156	Neurosecretory protein VGF	241.158	0.91375	10.5	17.666	0.750935	0.295919	0.57913
P20651	Serine/threonine-protein phosphatase 2B catalytic subunit beta isoform	788.355	0.17	11.5	25.0475	0.844048	0.445059	0.676508
P20760	Ig gamma-2A chain C region	916.195	0.31	7.72727	30.2918	0.918432	0.44263	0.676508
P20788	Cytochrome b-c1 complex subunit Rieske, mitochondrial	1405.18	0	6.41667	35.0375	0.776889	0.000325848	0.0148494
P21396	Amine oxidase [flavin-containing] A	396.576	0.19	10.9167	20.6108	0.99159	0.949306	0.986766
P21571	ATP synthase-coupling factor 6, mitochondrial	4088.31	0	6.33333	53.7808	1.15197	0.637462	0.828473
P21575	Dynamin-1	1484.07	0	29.1667	42.2558	0.9639	0.483721	0.69197
P21707	Synaptotagmin-1	1426.37	0	16	40.895	0.869265	0.37422	0.634979
P21708	Mitogen-activated protein kinase 3	508.01	2.03	10.4167	31.4467	1.90642	0.0373313	0.218926
P21913	Succinate dehydrogenase [ubiquinone] iron-sulfur subunit, mitochondrial	303.741	1.36143	6	15.6908	0.871282	0.434114	0.676508
P22062	Protein-L-isoaspartate(D-aspartate) O-methyltransferase	1361.58	0	8.66667	54.6267	0.88493	0.064397	0.284152
P23565	Alpha-internexin	5829.08	0	22.6667	47.6725	1.07448	0.147005	0.455288
P24268	Cathepsin D	402.646	0.6675	7	16.9745	0.941416	0.523233	0.72887
P25113	Phosphoglycerate mutase 1	13345.5	0	15.3333	60.105	0.84268	0.0022941	0.0513554
P25286-2	Isoform II of V-type proton ATPase 116 kDa subunit a isoform 1	476.113	0.615	14.4167	17.5583	0.892346	0.582392	0.777334
P25809	Creatine kinase U-type, mitochondrial	1510.95	0	11	34.0125	0.926038	0.00699099	0.0911184
P26284	Pyruvate dehydrogenase E1 component subunit alpha, somatic form, mitochondrial	1786.11	0	11.0833	35.2358	1.07271	0.0324484	0.207021
P26772	10 kDa heat shock protein, mitochondrial	11994.5	0	9.41667	71.405	0.787178	0.0111411	0.101543
P27139	Carbonic anhydrase 2	1657.75	0	8.5	44.0375	1.00959	0.902223	0.9701
P27605	Hypoxanthine-guanine phosphoribosyltransferase	1024.65	0	7.41667	41.7808	0.992863	0.911851	0.9701
P27881	Hexokinase-2	191.891	0.975	15.0833	10.9225	0.392176	0.231298	0.527264
P28480	T-complex protein 1 subunit alpha	386.862	0.486	12.5455	22.6464	0.512605	0.345514	0.615072
P30009	Myristoylated alanine-rich C-kinase substrate	350.923	1.54	4.18182	19.2409	0.693817	0.241125	0.53207
P30904	Macrophage migration inhibitory factor	5669.26	0	4.33333	40.4342	0.89984	0.459218	0.676508
P31000	Vimentin	4135.85	0	24.3333	54.6308	1.00378	0.952974	0.987009
P31044	Phosphatidylethanolamine-binding protein 1	23338.8	0	11.8333	77.8533	0.899579	0.0252242	0.174564
P32551	Cytochrome b-c1 complex subunit 2, mitochondrial	2081.16	0	14.6667	41.1508	1.1024	0.00708196	0.0911184
P34058	Heat shock protein HSP 90-beta	9717.36	0	39.75	52.9817	0.82381	5.96136e-05	0.00620348
P34926	Microtubule-associated protein 1A	717.282	0	58	29.6808	0.955723	0.567272	0.773333
P35213-2	Isoform Short of 14-3-3 protein beta/alpha	12060.4	0	14.25	57.4108	1.16994	0.400223	0.658529
P35434	ATP synthase subunit delta, mitochondrial	9196.51	0	3.25	21.8258	1.12702	0.38249	0.64218
P35704	Peroxiredoxin-2	8079.14	0	8	51.4717	0.984287	0.654478	0.828473
P37377	Alpha-synuclein	6792.22	0	5.41667	41.9033	0.707665	0.0353589	0.212821
P38652	Phosphoglucomutase-1	320.046	1.042	14.1	19.946	1.33825	0.0919936	0.33731
P38983	40S ribosomal protein AS	398.884	1.14	6.8	27.017	1.24093	0.294358	0.57913
P39069	Adenylate kinase isoenzyme 1	2080.39	0	7.16667	46.3492	0.88694	0.408335	0.667995
P41565	Isocitrate dehydrogenase [NAD] subunit gamma 1, mitochondrial	584.346	0.295	9	30.5342	0.96595	0.734184	0.877171
P42123	L-lactate dehydrogenase B chain	11932.5	0	16	48.4025	1.10042	0.0917001	0.33731
P45592	Cofilin-1	3445.03	0	7.5	58.8358	0.995256	0.949647	0.986766
P46462	Transitional endoplasmic reticulum ATPase	3100.18	0	26.8333	45.8842	1.03356	0.688623	0.835323
P47727	Carbonyl reductase [NADPH] 1	413.893	1.135	9.09091	34.8218	0.856274	0.232248	0.527264
P47728	Calretinin	5970.69	0	18.5	56.7958	0.836367	0.0257194	0.174564
P47860	ATP-dependent 6-phosphofructokinase, platelet type	216.741	1.685	16.9091	18.9427	1.20731	0.207898	0.523777
P47942	Dihydropyrimidinase-related protein 2	17843	0	32.3333	68.9833	1.38264	5.25322e-09	1.67578e-06
P48037	Annexin A6	219.246	1.06889	18.25	19.3292	0.775211	0.0608129	0.281149
P48500	Triosephosphate isomerase	11576.9	0	15.9167	73.4942	1.03049	0.307988	0.595443
P48721	Stress-70 protein, mitochondrial	1288.07	0	21.1667	40.9067	1.4097	0.0377458	0.218926
P49432	Pyruvate dehydrogenase E1 component subunit beta, mitochondrial	2589.56	0	12.1667	41.5967	0.933313	0.118249	0.40739
P50137	Transketolase	483.761	0.87	17.3636	34.2055	1.05064	0.576248	0.774441
P50398	Rab GDP dissociation inhibitor alpha	6264.43	0	25.8333	64.1692	0.980304	0.672015	0.831815
P50399	Rab GDP dissociation inhibitor beta	1642.36	0	21.8333	57.2275	1.11219	0.128991	0.41988
P50408	V-type proton ATPase subunit F	1203.48	0.21	5	42.8582	0.742686	0.0196607	0.156794
P50503	Hsc70-interacting protein	1221.66	0	7.08333	18.5475	0.863279	0.0864834	0.332388
P50554	4-aminobutyrate aminotransferase, mitochondrial	3967.84	0	18.0833	51.6833	1.0002	0.997229	0.999717
P51635	Alcohol dehydrogenase [NADP(+)]	757.133	0	9.09091	36.84	1.23953	0.0551355	0.270588
P52303-2	Isoform B of AP-1 complex subunit beta-1	592.627	0	18.0833	21.9925	0.907651	0.683947	0.835323
P52555	Endoplasmic reticulum resident protein 29	1983.92	0	8.33333	35.7375	0.928289	0.226374	0.527264
P52873	Pyruvate carboxylase, mitochondrial	165.343	1.4875	17.1667	13.065	1.1079	0.155628	0.464494
P53534	Glycogen phosphorylase, brain form (Fragment)	2195.21	0	33	43.925	0.929088	0.425196	0.676508
P54311	Guanine nucleotide-binding protein G(I)/G(S)/G(T) subunit beta-1	3892.91	0	10.5833	41.3467	1.24331	0.394494	0.655775
P54313	Guanine nucleotide-binding protein G(I)/G(S)/G(T) subunit beta-2	3831.87	0	9.08333	36.3483	0.879505	0.590934	0.782191
P54921	Alpha-soluble NSF attachment protein	2081.38	0	12.3333	52.1475	0.472855	0.0205484	0.158715
P55063	Heat shock 70 kDa protein 1-like	4118.65	0	11.6667	24.025	1.58426	0.482577	0.69197
P55068	Brevican core protein	640.362	0.23	14.75	22.6392	0.784366	0.0184264	0.152687
P56574	Isocitrate dehydrogenase [NADP], mitochondrial	218.915	1.64125	12.2	23.385	0.98837	0.959718	0.987581
P59215	Guanine nucleotide-binding protein G(o) subunit alpha	3876.94	0	13.5833	44.4925	1.1159	0.20521	0.523695
P60203	Myelin proteolipid protein	11410.5	0	7.33333	25.7208	0.83746	0.639616	0.828473
P60711	Actin, cytoplasmic 1	38233.5	0	27.5833	73.8892	1.53598	0.123034	0.408832
P60881	Synaptosomal-associated protein 25	602.187	0.66	11.5	39.855	1.19632	0.498728	0.707085
P61107	Ras-related protein Rab-14	4237.92	0.22	7.27273	46.85	1.00114	0.997059	0.999717
P61765	Syntaxin-binding protein 1	15066.4	0	29.3333	56.55	0.936028	0.641773	0.828473
P61983	14-3-3 protein gamma	19928.6	0	12	48.9875	0.899663	0.0186671	0.152687
P62161	Calmodulin	24905.8	0	11.0833	55.7617	0.87217	9.35605e-05	0.00620348
P62260	14-3-3 protein epsilon	28433.9	0	20.9167	70.9475	0.870546	0.00873228	0.0928532
P62630	Elongation factor 1-alpha 1	7182.83	0	15.3333	42.1908	1.12817	0.0239958	0.170103
P62632	Elongation factor 1-alpha 2	5914.14	0	16.1667	47.5517	1.08957	0.2806	0.559446
P62762	Visinin-like protein 1	1590.39	0	9.33333	50.8725	0.711925	0.00647881	0.0911184
P62804	Histone H4	11935.7	0	7.5	52.1017	0.926061	0.329233	0.603594
P62815	V-type proton ATPase subunit B, brain isoform	3051.57	0	17.6667	43.1508	1.00315	0.903526	0.9701
P62898	Cytochrome c, somatic	2833.97	0	5.83333	50.7142	1.05329	0.747487	0.886196
P62944	AP-2 complex subunit beta	865.92	0	22.5833	30.7	1.1358	0.193036	0.504742
P62959	Histidine triad nucleotide-binding protein 1	5252.38	0	3.81818	47.1145	0.852466	0.411796	0.670218
P62963	Profilin-1	3354.23	0	5.90909	47.8555	0.895558	0.294962	0.57913
P62986	Ubiquitin-60S ribosomal protein L40	21331.8	0	7.91667	52.28	1.00461	0.946892	0.986766
P63004	Platelet-activating factor acetylhydrolase IB subunit alpha	412.437	0.27	10.3636	25.6309	1.36408	0.0893388	0.33731
P63012	Ras-related protein Rab-3A	5793.67	0	8.91667	45.3792	1.04367	0.479357	0.69197
P63018	Heat shock cognate 71 kDa protein	16192.4	0	36.6667	54.7083	1.04552	0.118769	0.40739
P63039	60 kDa heat shock protein, mitochondrial	3093.46	0	17.3333	39.7025	0.935438	0.355904	0.6204
P63086	Mitogen-activated protein kinase 1	985.082	0	12.9167	42.5525	0.976603	0.660496	0.828473
P63102	14-3-3 protein zeta/delta	33900.2	0	19.25	64.2175	1.05485	0.378239	0.638403
P67779	Prohibitin	1349.85	0	8.16667	40.8708	0.906676	0.0466663	0.244613
P68182	cAMP-dependent protein kinase catalytic subunit beta	344.403	1.574	6.54545	18.3627	0.980726	0.878467	0.969543
P68255	14-3-3 protein theta	9225.15	0	14.6667	49.8317	0.906979	0.688684	0.835323
P68370	Tubulin alpha-1A chain	35154.1	0	35	76.5158	0.764593	0.649714	0.828473
P68511	14-3-3 protein eta	13356.9	0	14.8333	51.5917	1.02587	0.57618	0.774441
P69682	Adaptin ear-binding coat-associated protein 1	694.096	1.18	4.36364	18.5764	1.18925	0.325658	0.603216
P69897	Tubulin beta-5 chain	101425	0	36.3333	69.725	1.13985	0.426516	0.676508
P70566	Tropomodulin-2	484.528	0.59	9.54545	28.7491	1.03375	0.794041	0.911148
P81155	Voltage-dependent anion-selective channel protein 2	2506.1	0	7.41667	36.4408	0.667633	0.0467755	0.244613
P82995	Heat shock protein HSP 90-alpha	12560.7	0	43.8333	51.1142	1.0628	0.311662	0.598916
P84092	AP-2 complex subunit um	964.62	0	12.3333	32.3942	1.25165	0.0232098	0.168271
P85108	Tubulin beta-2A chain	100550	0	36.5833	72.6967	0.92854	0.353003	0.618725
P85834	Elongation factor Tu, mitochondrial	859.737	0	10.9167	30.4942	1.15166	0.103524	0.371058
P85845	Fascin	335.624	0.702	10.6667	18.7983	0.995645	0.957556	0.987581
P85969	Beta-soluble NSF attachment protein	2978.93	0	12.1667	48.9333	0.89338	0.264272	0.550009
P85970	Actin-related protein 2/3 complex subunit 2	234.326	1.06429	9.8	27.332	1.44536	0.161161	0.467367
P85973	Purine nucleoside phosphorylase	337.26	0.321667	8.81818	31.3936	0.955106	0.750072	0.886196
P86252	Transcriptional activator protein Pur-alpha (Fragments)	1595.55	0.38	3.91667	51.0867	0.866821	0.440334	0.676508
P97536	Cullin-associated NEDD8-dissociated protein 1	435.968	0.22	25.4167	24.2058	0.866013	0.0914085	0.33731
P97697	Inositol monophosphatase 1	1289.17	0	6.72727	27.3064	0.843269	0.0849685	0.330568
Q00715	Histone H2B type 1	6827.27	0	3.36364	26.4	0.944708	0.645754	0.828473
Q00981	Ubiquitin carboxyl-terminal hydrolase isozyme L1	23506.3	0	17.9167	70.9625	1.15469	0.064511	0.284152
Q02253	Methylmalonate-semialdehyde dehydrogenase [acylating], mitochondrial	206.92	0.781111	9.27273	16.2955	0.932005	0.789179	0.911148
Q02563	Synaptic vesicle glycoprotein 2A	247.04	1.5775	7.18182	8.01364	0.936514	0.665721	0.829551
Q05140-2	Isoform 2 of Clathrin coat assembly protein AP180	1049.54	0	13.4167	14.5367	0.888194	0.157258	0.464494
Q05546	Tenascin-R	762.1	0	21.75	21.9892	0.891301	0.121649	0.408832
Q05683	Glutamate decarboxylase 2	746.453	0	7.25	19.2158	1.27053	0.0581745	0.273696
Q05962	ADP/ATP translocase 1	2258.34	0	14.3333	45.0783	0.839813	0.275037	0.557276
Q05982	Nucleoside diphosphate kinase A	5700.07	0	8.33333	55.8108	1.21185	0.235969	0.530099
Q06647	ATP synthase subunit O, mitochondrial	971.769	0	6.91667	36.5025	0.958514	0.347063	0.615072
Q09073	ADP/ATP translocase 2	1138.61	0	13.5	41.5842	0.875298	0.452652	0.676508
Q3B8Q2	Eukaryotic initiation factor 4A-III	237.745	1.12778	8.75	15.6533	0.556115	0.239321	0.53207
Q3KR86	MICOS complex subunit Mic60 (Fragment)	483.337	0.23	14.1818	28.2127	0.954048	0.682046	0.835323
Q3MIE4	Synaptic vesicle membrane protein VAT-1 homolog	1491.77	0	12.9167	38.965	0.957952	0.685258	0.835323
Q3T1K5	F-actin-capping protein subunit alpha-2	813.651	0.22	7.75	38.2583	0.785934	0.00943837	0.0971239
Q4FZY0	EF-hand domain-containing protein D2	403.748	0.49	9.27273	29.5164	0.992112	0.974795	0.996665
Q4QRB4	Tubulin beta-3 chain	64234.7	0	33.5	67.3142	0.972961	0.590087	0.782191
Q4V7C7	Actin-related protein 3	257.159	0.51875	8.2	21.984	0.814968	0.270959	0.557276
Q561S0	NADH dehydrogenase [ubiquinone] 1 alpha subcomplex subunit 10, mitochondrial	861.057	0	9.63636	39.9245	0.84722	0.34198	0.615072
Q5BJS7	Copine-9	185.496	0.72625	12.5556	12.1567	0.759391	0.433417	0.676508
Q5BK63	NADH dehydrogenase [ubiquinone] 1 alpha subcomplex subunit 9, mitochondrial	923.582	0	10.5455	33.3018	0.755228	0.00840738	0.0928532
Q5FVI6	V-type proton ATPase subunit C 1	346.618	0.535714	10.7273	22.4664	1.36887	0.00241483	0.0513554
Q5GFD9	Protein IMPACT	1985.57	0	9.16667	39.3	0.865	0.0110978	0.101543
Q5M7U6	Actin-related protein 2	307.465	1.05333	7.75	17.8612	0.583645	0.0514437	0.260485
Q5RJQ4	NAD-dependent protein deacetylase sirtuin-2	1103.62	0	9.66667	39.4517	0.927513	0.373516	0.634979
Q5RKI0	WD repeat-containing protein 1	1393.34	0	12.9167	36.3167	0.840962	0.324244	0.603216
Q5RKI1	Eukaryotic initiation factor 4A-II	398.743	0.473333	10.5	25.675	0.788711	0.0821013	0.328399
Q5U206	Calmodulin-like protein 3	7123.99	0	8.16667	46.3083	0.726856	0.450234	0.676508
Q5U300	Ubiquitin-like modifier-activating enzyme 1	490.158	0	20.6667	26.2292	1.08239	0.218417	0.527264
Q5U316	Ras-related protein Rab-35	4685.67	0	4.90909	30.9364	1.09553	0.778869	0.906785
Q5U318	Astrocytic phosphoprotein PEA-15	7979.14	0	5.83333	46.2183	0.885556	0.160169	0.467367
Q5XI73	Rho GDP-dissociation inhibitor 1	9338.4	0	10	58.6192	0.782741	0.00316021	0.0560059
Q5XI78	2-oxoglutarate dehydrogenase, mitochondrial	251.743	0.742222	20.6667	20.0558	0.998116	0.985075	0.999717
Q5XIF6	Tubulin alpha-4A chain	28614.8	0	32.6667	71.4467	1.08019	0.164043	0.468715
Q5XIM9	T-complex protein 1 subunit beta	236.077	1.29625	12.6	20.523	0.877011	0.662259	0.828473
Q5XIT1	Microtubule-associated protein RP/EB family member 3	661.821	0.205	8.33333	26.8983	0.999918	0.999717	0.999717
Q60587	Trifunctional enzyme subunit beta, mitochondrial	456.746	1.06	9.63636	22.45	0.739091	0.0818777	0.328399
Q62656	Receptor-type tyrosine-protein phosphatase zeta	605.829	0.19	21.75	13.3058	0.896612	0.135777	0.42984
Q62876	Synaptogyrin-1	1532.09	0	2.36364	12.7845	0.935632	0.460195	0.676508
Q62950	Dihydropyrimidinase-related protein 1	5250.71	0	20	44.275	1.05844	0.231719	0.527264
Q62951	Dihydropyrimidinase-related protein 4 (Fragment)	250.344	0.4525	12	21.1473	1.16668	0.372774	0.634979
Q62952	Dihydropyrimidinase-related protein 3	1730.3	0	17.8333	43.3342	0.816418	0.190446	0.504742
Q63081	Protein disulfide-isomerase A6	458.656	0.973333	9.16667	27.8217	0.781206	0.210168	0.523777
Q63083	Nucleobindin-1	268.519	0.688571	17.4167	29.865	0.886797	0.547292	0.749297
Q63198	Contactin-1	186.911	1.39273	19.5833	19.8592	1.99528	0.344202	0.615072
Q63525	Nuclear migration protein nudC	442.451	0.2975	10.8333	32.4792	0.980486	0.838386	0.941708
Q63537-2	Isoform IIb of Synapsin-2	1931.47	0	15.5833	43.11	0.834544	0.224941	0.527264
Q63560	Microtubule-associated protein 6	855.085	0	22.8333	32.7458	1.21535	0.226297	0.527264
Q63610	Tropomyosin alpha-3 chain	3779.21	0	14.3333	44.7583	1.03147	0.938221	0.986766
Q63716	Peroxiredoxin-1	2291.1	0	9.75	53.895	1.04622	0.202917	0.52202
Q63754	Beta-synuclein	24531.5	0	7.41667	46.5958	0.747477	0.0664176	0.286314
Q64119	Myosin light polypeptide 6	1163.9	0	6.22222	45.3267	1.0188	0.758869	0.890807
Q641Y2	NADH dehydrogenase [ubiquinone] iron-sulfur protein 2, mitochondrial	350.199	0.51	10.75	23.1467	0.891302	0.606986	0.800118
Q64541	Sodium/potassium-transporting ATPase subunit alpha-4	1301.04	0	15.9167	18.11	0.576158	0.233054	0.527264
Q64548	Reticulon-1	420.644	0.576667	12	23.4658	0.927423	0.659758	0.828473
Q66HA6	ADP-ribosylation factor-like protein 8B	2112.06	0	7.75	44.7125	1.25746	0.0101982	0.101543
Q66HA8	Heat shock protein 105 kDa	571.223	0.4	21.5	27.4192	1.24123	0.170905	0.482467
Q66HD0	Endoplasmin	2241.81	0	23.5833	37.6975	0.970058	0.576046	0.774441
Q66HF1	NADH-ubiquinone oxidoreductase 75 kDa subunit, mitochondrial	2140.05	0	25	45.53	1.05465	0.251388	0.541842
Q68FS4-2	Isoform 2 of Cytosol aminopeptidase	257.07	1.80875	10.7273	19.5973	1.18679	0.324994	0.603216
Q68FX0	Isocitrate dehydrogenase [NAD] subunit beta, mitochondrial	756.849	0	12.1667	38.2908	1.13752	0.122705	0.408832
Q68FY0	Cytochrome b-c1 complex subunit 1, mitochondrial	2518.38	0	12.75	38.0042	1.35523	0.00013481	0.00716741
Q6AY84	Secernin-1	1110.41	0.18	8	28.14	1.10502	0.5188	0.725865
Q6AYH5	Dynactin subunit 2	733.284	0	11.9167	36.9608	0.900519	0.316739	0.601426
Q6AYN4	Phytanoyl-CoA hydroxylase-interacting protein-like	218.482	1.002	9	20.0883	0.868562	0.349914	0.6167
Q6IUR5	Neudesin	488.523	1.15	5.11111	33.7222	0.928313	0.881403	0.969543
Q6LED0	Histone H3.1	600.762	0	2.55556	13.4778	0.710143	0.127867	0.41988
Q6NYB7	Ras-related protein Rab-1A	4071.43	0	3.83333	26.22	0.886451	0.672753	0.831815
Q6P502	T-complex protein 1 subunit gamma	961.582	0	14.4167	34.1133	1.17322	0.00259525	0.0517428
Q6P6R2	Dihydrolipoyl dehydrogenase, mitochondrial	851.774	0.215	11.5833	28.1267	1.1126	0.227739	0.527264
Q6P6V0	Glucose-6-phosphate isomerase	5907.11	0	22.4167	48.1633	1.152	0.00714094	0.0911184
Q6P7Q4	Lactoylglutathione lyase	1644.52	0	9.83333	59.1042	0.812678	0.0710072	0.302017
Q6P9T8	Tubulin beta-4B chain	94815.9	0	37.75	68.1267	1.07426	0.25429	0.54442
Q6P9V9	Tubulin alpha-1B chain	36632.8	0	34.3333	75.7767	1.23184	0.231529	0.527264
Q6PCU2	V-type proton ATPase subunit E 1	664.574	1.09	8.4	32.124	0.715275	0.0503958	0.259294
Q6Q0N1	Cytosolic non-specific dipeptidase	463.506	1.495	10.8333	30.1933	1.24563	0.178153	0.49418
Q8K4Y5	Leucine-rich glioma-inactivated protein 1	236.386	0.987143	10.4	14.003	1.16736	0.470451	0.688412
Q8VBU2-2	Isoform 2 of Protein NDRG2	3574.96	0	10.9167	45.705	0.798324	0.00142823	0.0414186
Q8VHF5	Citrate synthase, mitochondrial	2529.23	0	14.1667	34.9958	0.950913	0.245471	0.532689
Q91Y81	Septin-2	440.731	0.43	7.9	26.094	1.3038	0.242847	0.53207
Q920J4	Thioredoxin-like protein 1	938.859	0	9	42.705	1.14252	0.278657	0.559067
Q920L2	Succinate dehydrogenase [ubiquinone] flavoprotein subunit, mitochondrial	282.56	0.691429	15.3333	26.3975	0.942692	0.72251	0.866468
Q99NA5	Isocitrate dehydrogenase [NAD] subunit alpha, mitochondrial	2136.35	0	11.75	36.065	0.955081	0.0523916	0.261139
Q9EQX9	Ubiquitin-conjugating enzyme E2 N	7250.94	0	7.16667	52.7417	1.02036	0.876432	0.969543
Q9ER34	Aconitate hydratase, mitochondrial	5076.26	0	37.4167	57.5867	1.30558	0.0849737	0.330568
Q9ERB4	Versican core protein (Fragments)	308.739	0.586667	22.5	7.57833	0.809823	0.0572245	0.273696
Q9JHU0	Dihydropyrimidinase-related protein 5	1554.59	0	14	42.5833	1.15448	0.0583427	0.273696
Q9JJM9	Septin-5	724.989	0.21	11.6667	38.46	0.59126	0.0318611	0.207021
Q9JK11	Reticulon-4	513.725	0.41	16.4167	20.0625	0.972117	0.838369	0.941708
Q9QUL6	Vesicle-fusing ATPase	3789.37	0	33.25	51.085	1.07982	0.371524	0.634979
Q9QXQ0	Alpha-actinin-4	309.556	0.553333	25.2	26.181	0.777965	0.20938	0.523777
Q9QXU8	Cytoplasmic dynein 1 light intermediate chain 1	192.99	2.21875	10.9	21.11	1.21504	0.137232	0.42984
Q9QXU9	ProSAAS	9779.62	0	8.16667	45.0317	0.940205	0.342229	0.615072
Q9R1Z0	Voltage-dependent anion-selective channel protein 3	1674.79	0	8.41667	38.1025	0.978758	0.899948	0.9701
Q9WTP0-2	Isoform L of Band 4.1-like protein 1	461.25	0.22	24.0833	19.0475	1.32293	0.0823572	0.328399
Q9WTT6	Guanine deaminase	1194.27	0	15.75	47.7233	0.998223	0.969632	0.994575
Q9WVC0	Septin-7	996.246	0	11.9167	37.08	1.02318	0.889794	0.9701
Q9Z0V6	Thioredoxin-dependent peroxide reductase, mitochondrial	3769.5	0	6.91667	36.8342	1.01433	0.804583	0.916649
Q9Z0W5	Protein kinase C and casein kinase substrate in neurons protein 1	1028.56	0	14.8333	39.985	0.955457	0.420647	0.676508
Q9Z1P2	Alpha-actinin-1	203.566	1.08625	23.3	17.88	1.92837	0.0954788	0.346111
Q9Z2L0	Voltage-dependent anion-selective channel protein 1	3961.12	0	11.25	47.3792	0.888628	0.441543	0.676508
